# Supplementary material
Source: PubMed Central journal article supplement (PMC2774841)
Supplement: NIHMS155482-supplement-supplementary_fig.pdf [file NIHMS155482-supplement-supplementary_fig.pdf]

Rajhans et al., Supplementary Fig. S1

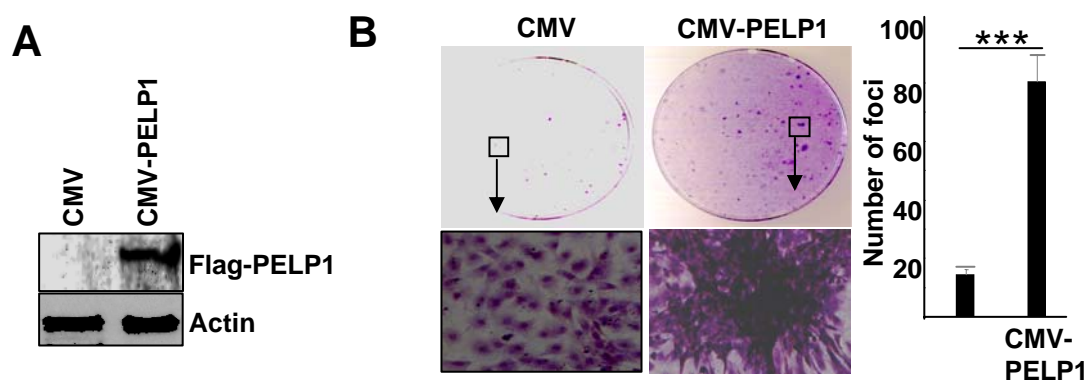

**Supplementary Fig. S1:** A, NIH3T3 cells were transfected with either CMV or CMV-PELP1 and expression of Flag tagged PELP1 was analyzed by western blotting. B, NIH3T3 cells were transiently transfected with CMV or CMV-PELP1 expression vector and foci formation was counted after 14 days.

Rajhans et al., Supplementary Fig. S2

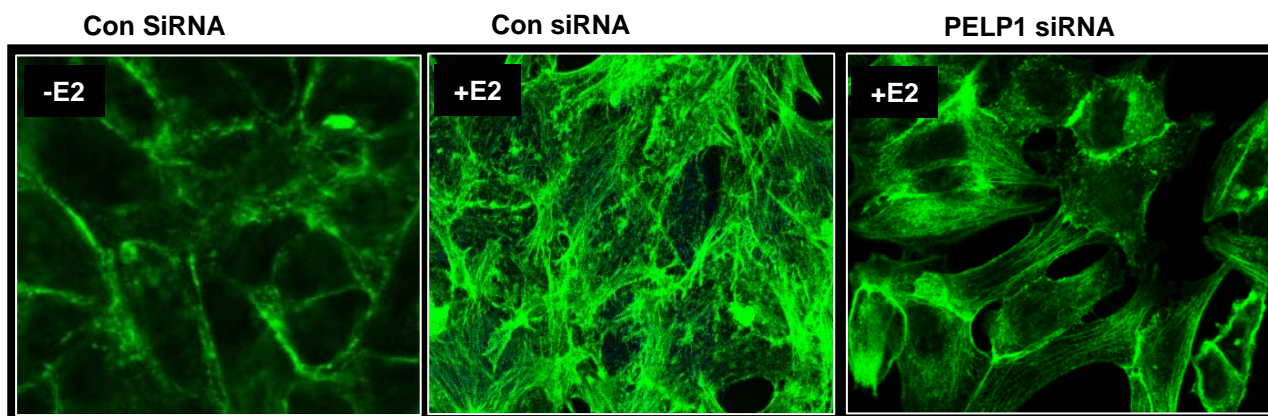

**Supplementary Fig. S2.** MCF-7 cells transfected with control siRNA or PELP1-siRNA were cultured in a DCC-serum-containing medium, after which they were treated with E2 for 10 minutes. The status of filamentous actin was visualized by phalloidin staining and was evaluated by confocal microscopy

Rajhans et al., Supplementary Fig. S3

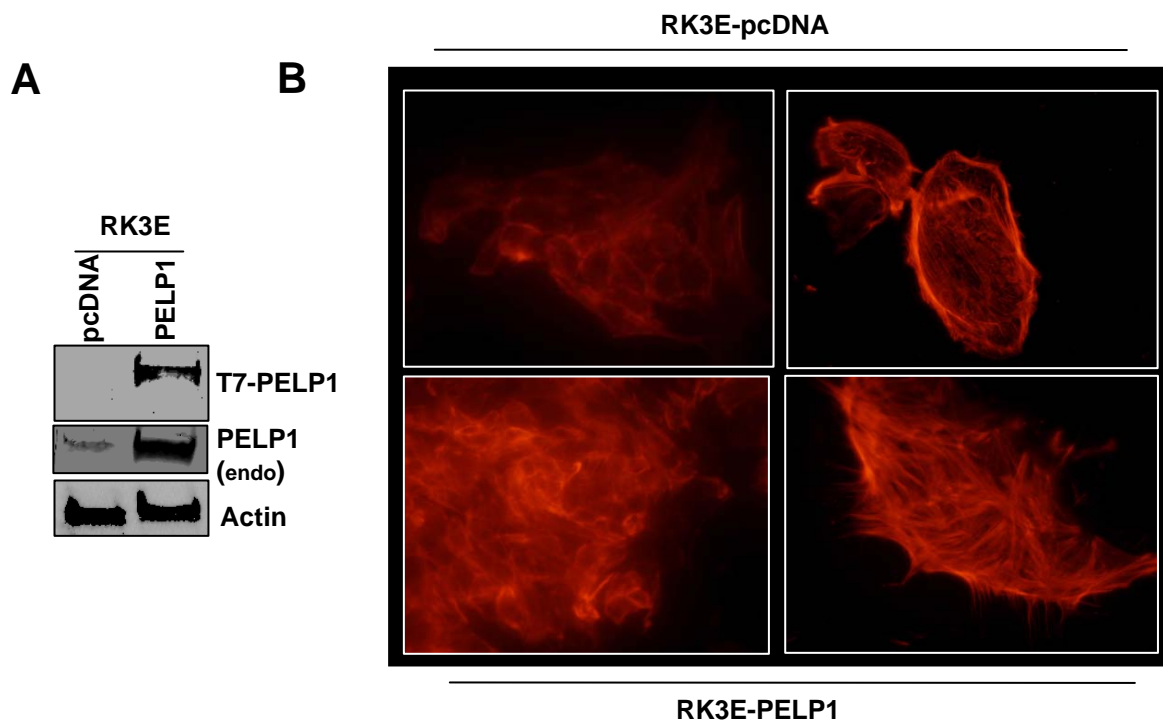

**Supplementary Fig. S3.** A, Expression of PELP1 in pooled RK3E clones expressing pcDNA or PELP1 was analyzed by western blotting using T7-epitope antibody and PELP1 antibody. Actin was used as a loading control. B, Pooled RK3E clones expressing pcDNA or PELP1 were stained with phalloidin, and filamentous actin structures were analyzed by fluorescence microscopy (Left panels in each subgroup). In the right panels an enlarged portion of the area is shown to visualize the actin structures.
